# Supplementary material for: Inductive effect of various seeds on the organic template-free synthesis of zeolite ZSM-5
Source: Royal Society of Chemistry journal article supplement (doi:10.1039/c3ce40784e), 2013-01-01
Supplement: c3ce40784e.pdf [file c3ce40784e.pdf]

**Electronic Supplementary Information (ESI) for**  
**Inductive effect of various seeds on the organic template-free**  
**synthesis of zeolite ZSM-5**

Qingjun Yu,<sup>a</sup> Qiang Zhang,<sup>a</sup> Jianwei Liu,<sup>a</sup> Chunyi Li\*<sup>a</sup> and Qiukai Cui<sup>b</sup>

<sup>a</sup> State Key Laboratory of Heavy Oil Processing, Department of Chemical Engineering, China University of Petroleum (East China), Qingdao 266580, PR China.

<sup>b</sup> Dagang Petrochemical Company, PetroChina Corporation, Tianjin, 300280, PR China.

Corresponding author Fax: +86 532 86981787; Tel: +86 532 86981862; E-mail:

[chylili\\_upc@126.com](mailto:chylili_upc@126.com)

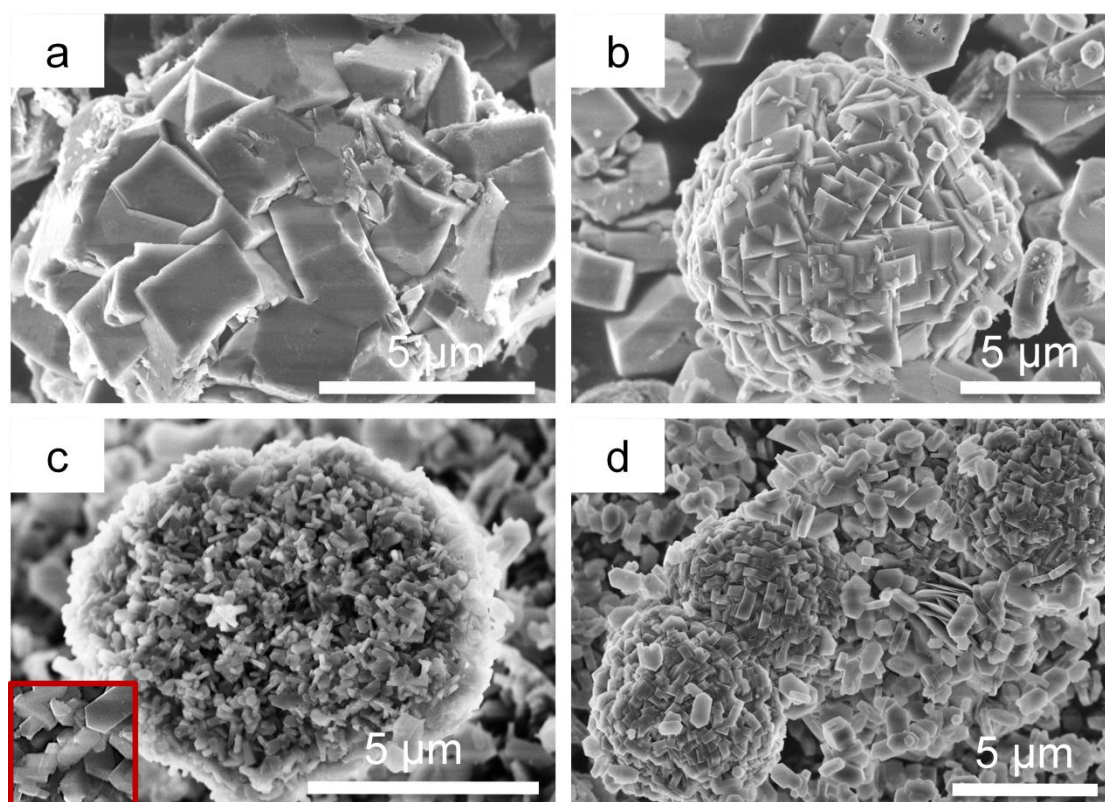

**Fig. S1.** The aggregation forms of ZSM-5 zeolites from various seed-assisted, template-free syntheses: (a) m-ZSM-5, (b) m-ZSM-11, (c) h-ZSM-5, (d) h-ZSM-11.

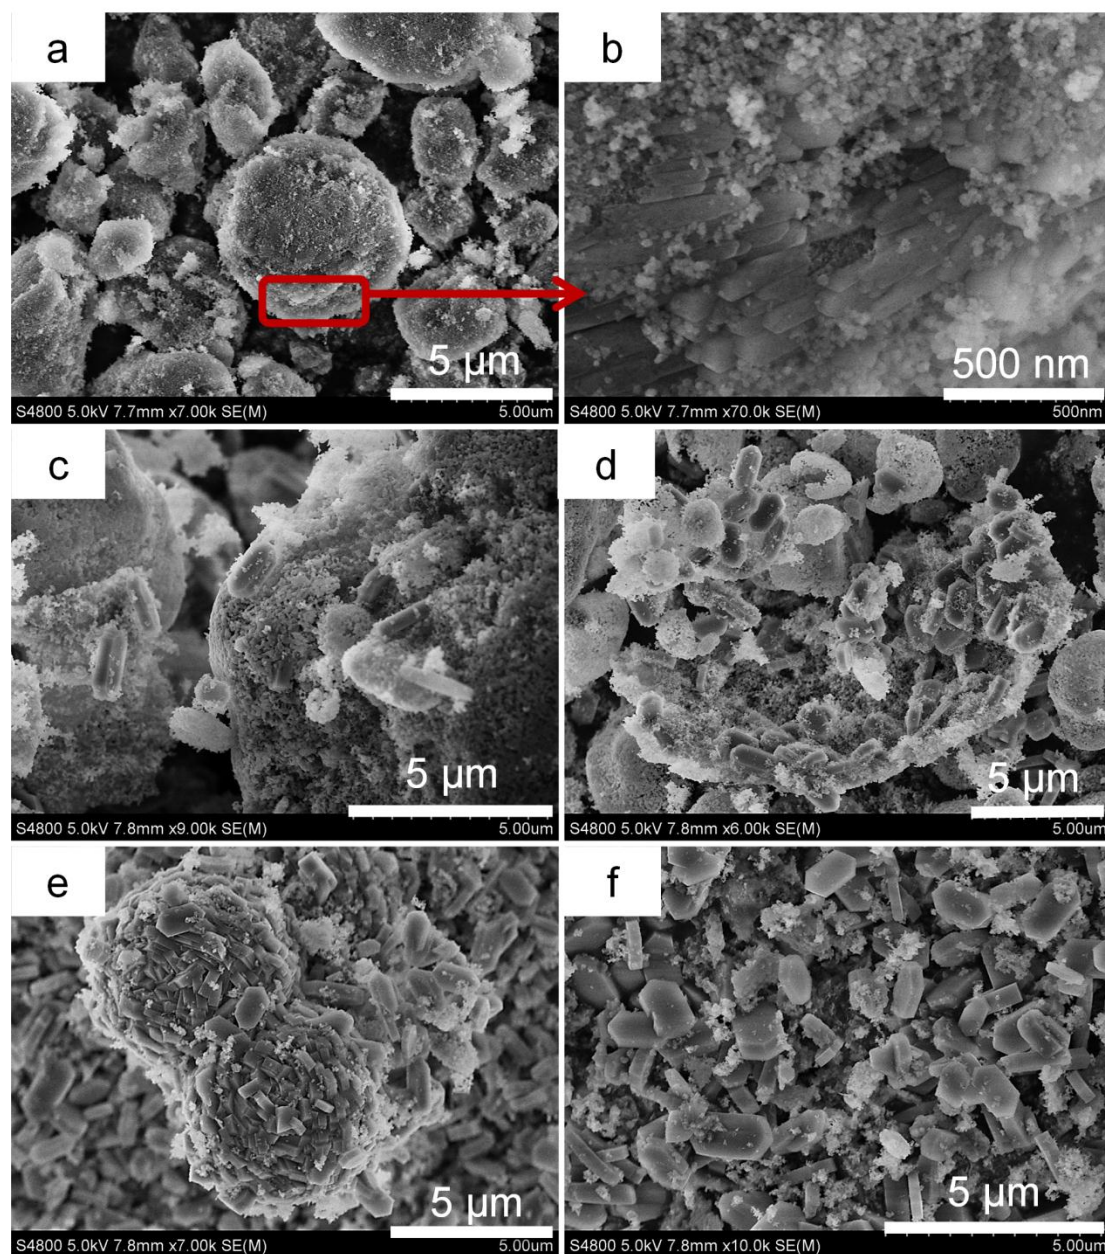

**Fig. S2.** The SEM images of samples obtained from various crystallization stages in the hierarchical ZSM-11-seeded synthesis system. (a-b) 170 °C for 0 h, (c-d) 170 °C for 8 h with RC of 39.18 %, (e-f) 170 °C for 10 h with RC of 77.47 %.
